# Supplementary material for: Copper-catalyzed direct amination of the superficial graphenic domains of multi-walled carbon nanotubes
Source: Royal Society of Chemistry journal article supplement (doi:10.1039/c7cy00601b), 2017-01-01
Supplement: c7cy00601b1.pdf [file c7cy00601b1.pdf]

# Copper-Catalyzed Direct Amination of the Superficial Graphenic Domains of Multi- Walled Carbon Nanotubes

Victor K. Abdelkader Fernández,<sup>†</sup> Manuel Melguizo,<sup>‡</sup> Celeste García Gallarín,<sup>‡</sup> M.

Dolores López de la Torre,<sup>‡</sup> M. Dolores Gutiérrez Valero,<sup>‡</sup> Amelia Martínez Alonso,<sup>§</sup>

María Domingo García,<sup>†</sup> F. Javier López Garzón,<sup>†,\*</sup> Manuel Pérez Mendoza.<sup>†</sup>

<sup>†</sup>Dpto. de Química Inorgánica, Facultad de Ciencias, Universidad de Granada, 18071  
Granada, Spain.

<sup>‡</sup>Dpto. de Química Inorgánica y Orgánica, Facultad de Ciencias Experimentales,  
Universidad de Jaén, 23071 Jaén, Spain.

<sup>§</sup>Instituto Nacional del Carbón, CSIC, Apartado 73, 33080 Oviedo, Spain.

\*Corresponding author: Tel +34 958 242397, Fax 34 958 248526, E-mail address:  
flopez@ugr.es

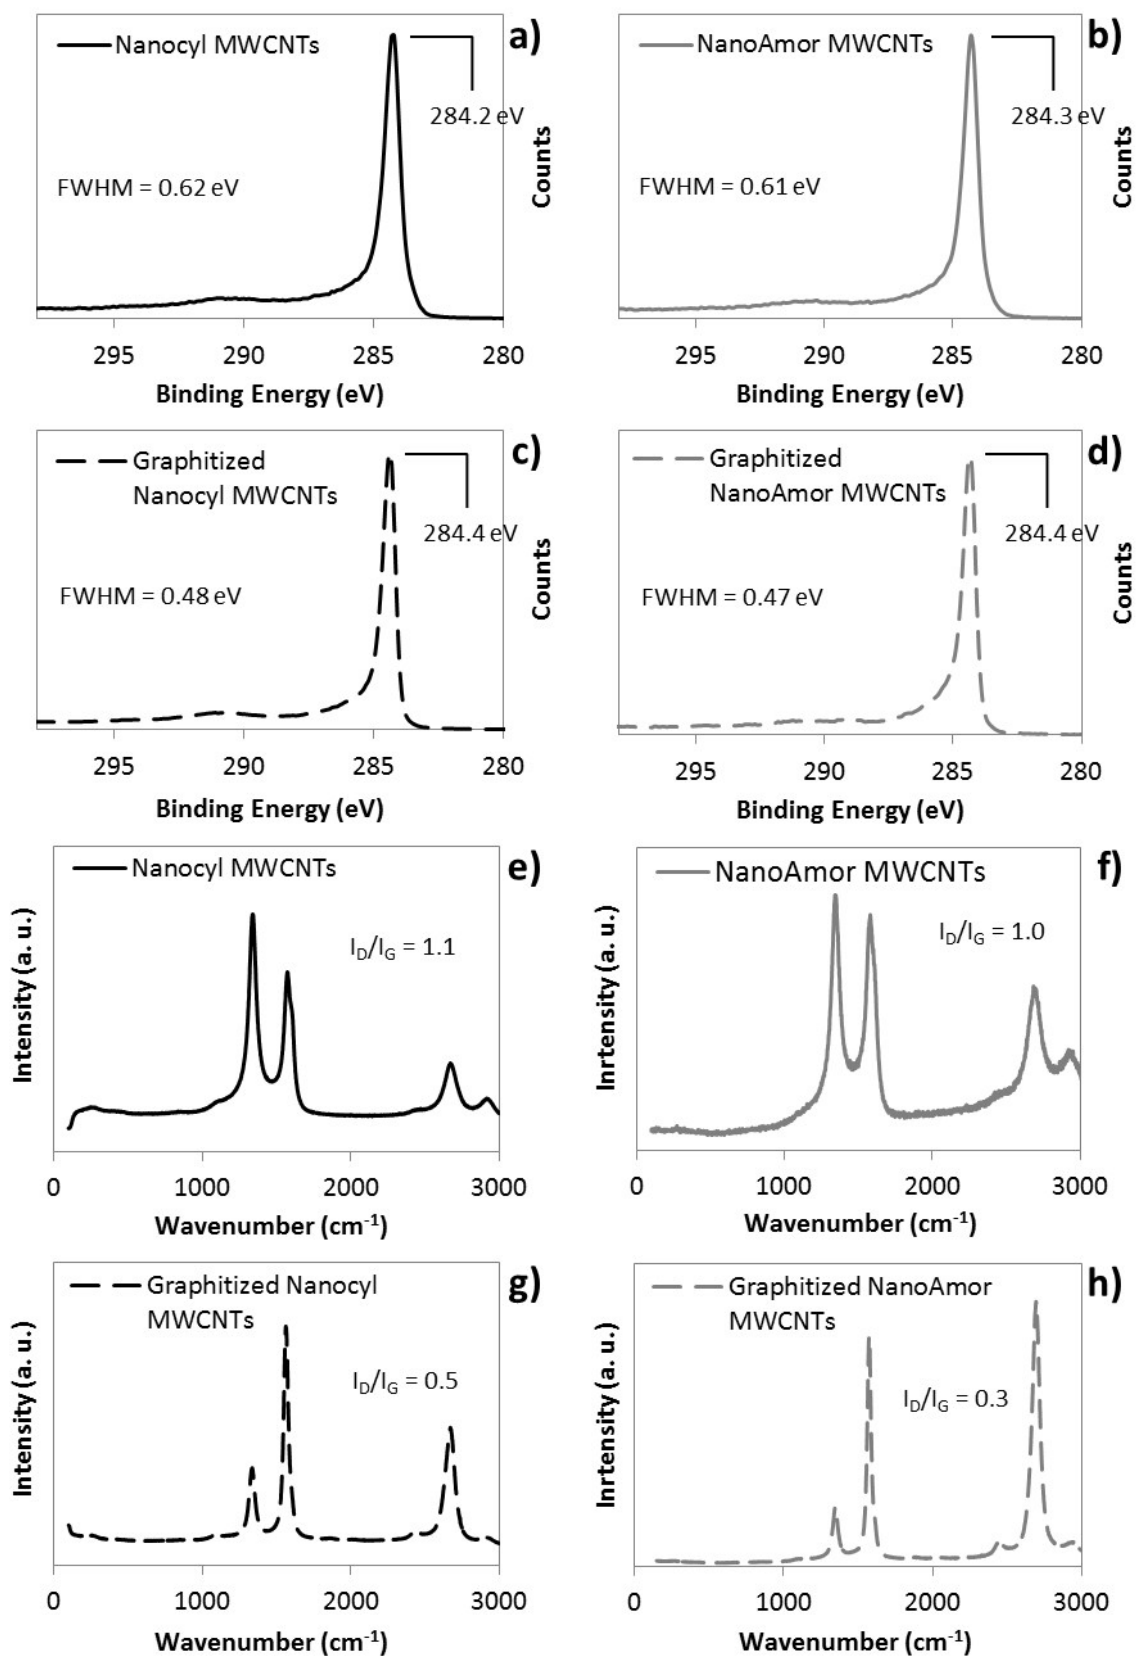

Figure S1. C<sub>1s</sub> XPS high resolution spectra of pristine nanotubes: a) MWCNTs from Nanocyl, b) MWCNTs from NanoAmor, c) graphitized Nanocyl MWCNTs and d) graphitized NanoAmor MWCNTs. (e - h) Their corresponding Raman spectra.

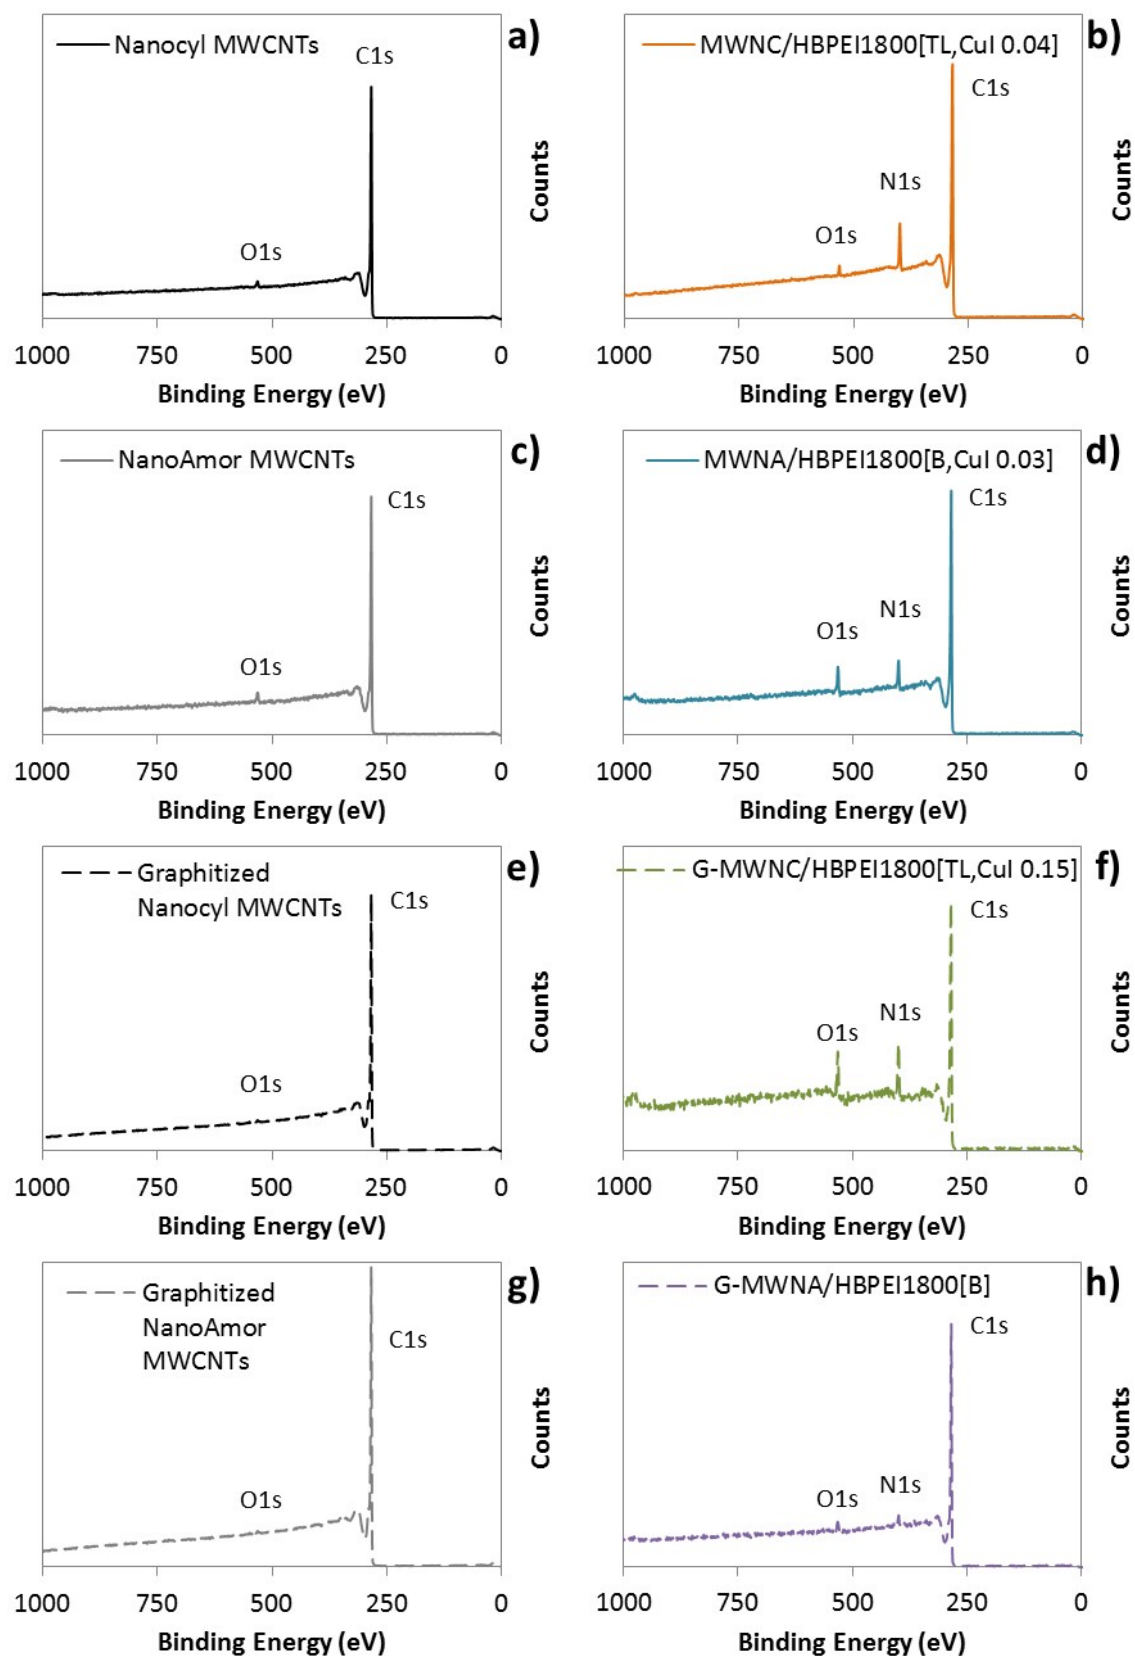

Figure S2. XPS survey spectra of pristine nanotubes (a, c, e and g) and of selected hybrids obtained from them (b, d, f and h).

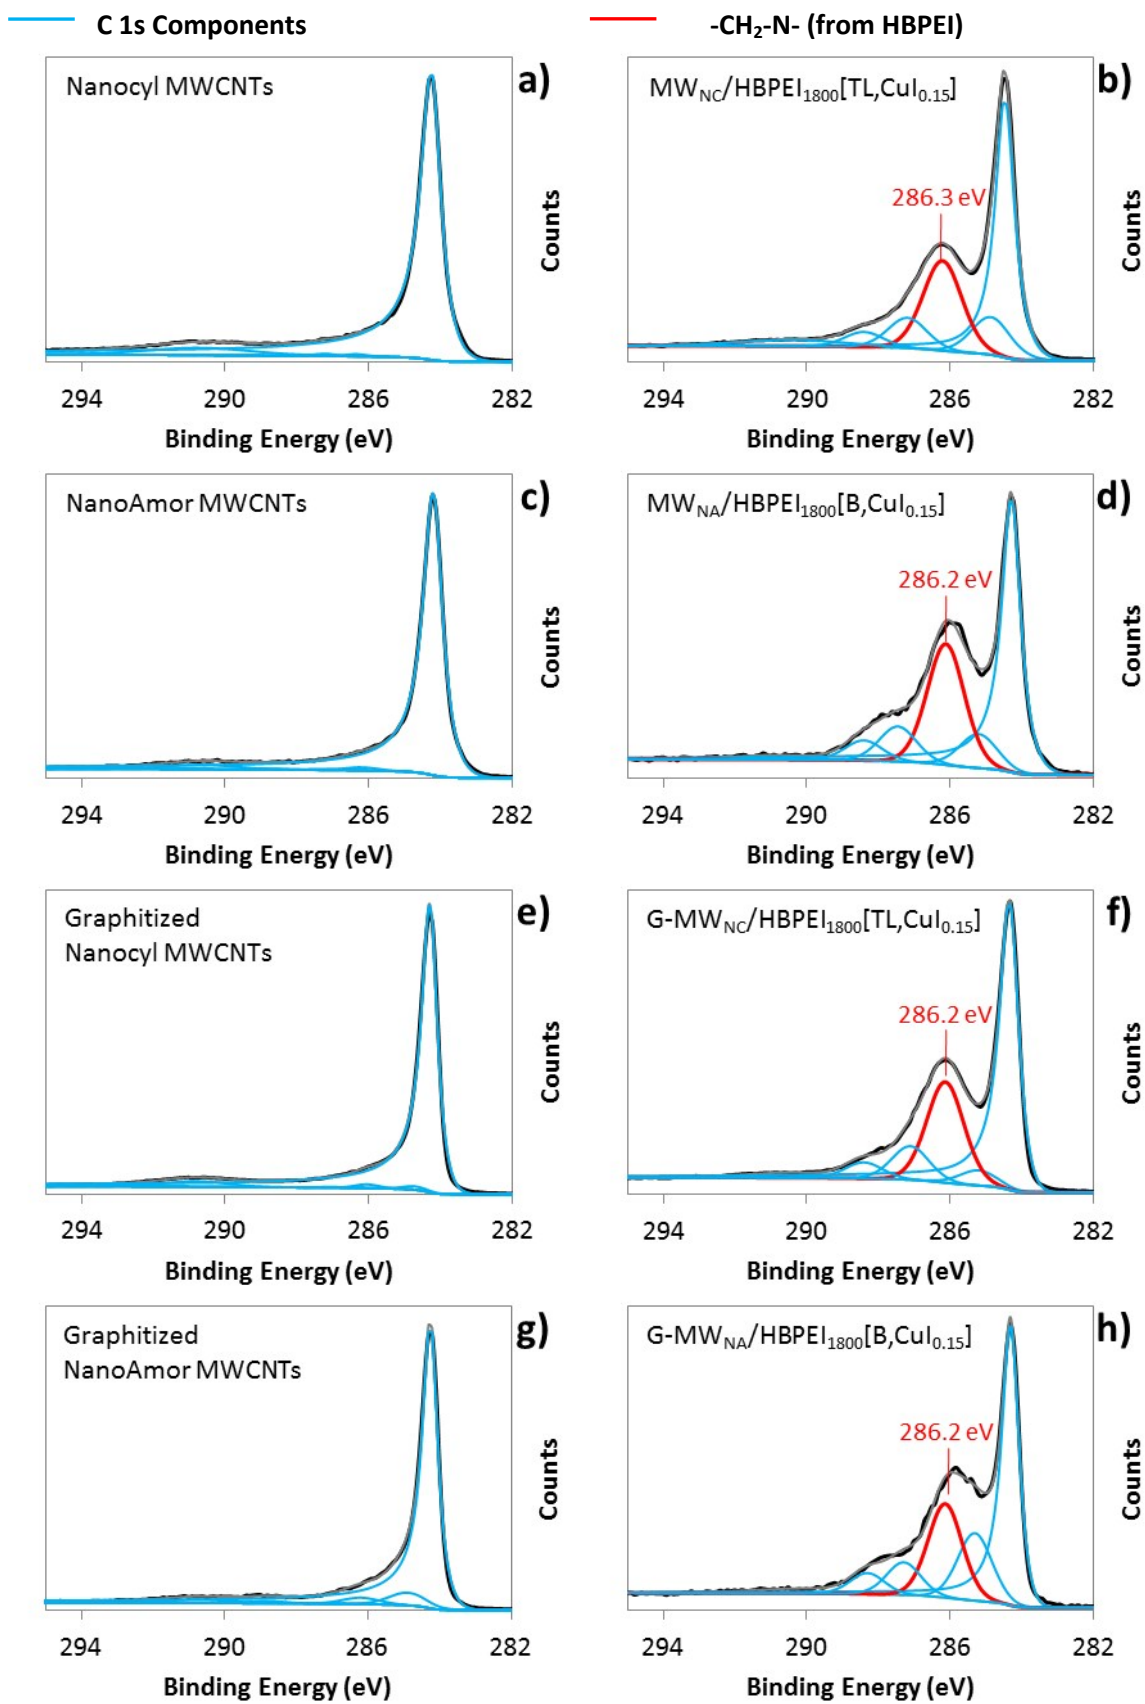

Figure S3. C<sub>1s</sub> XPS high resolution spectra of pristine nanotubes (a, c, e and g) and of selected hybrids obtained from them (b, d, f and h).

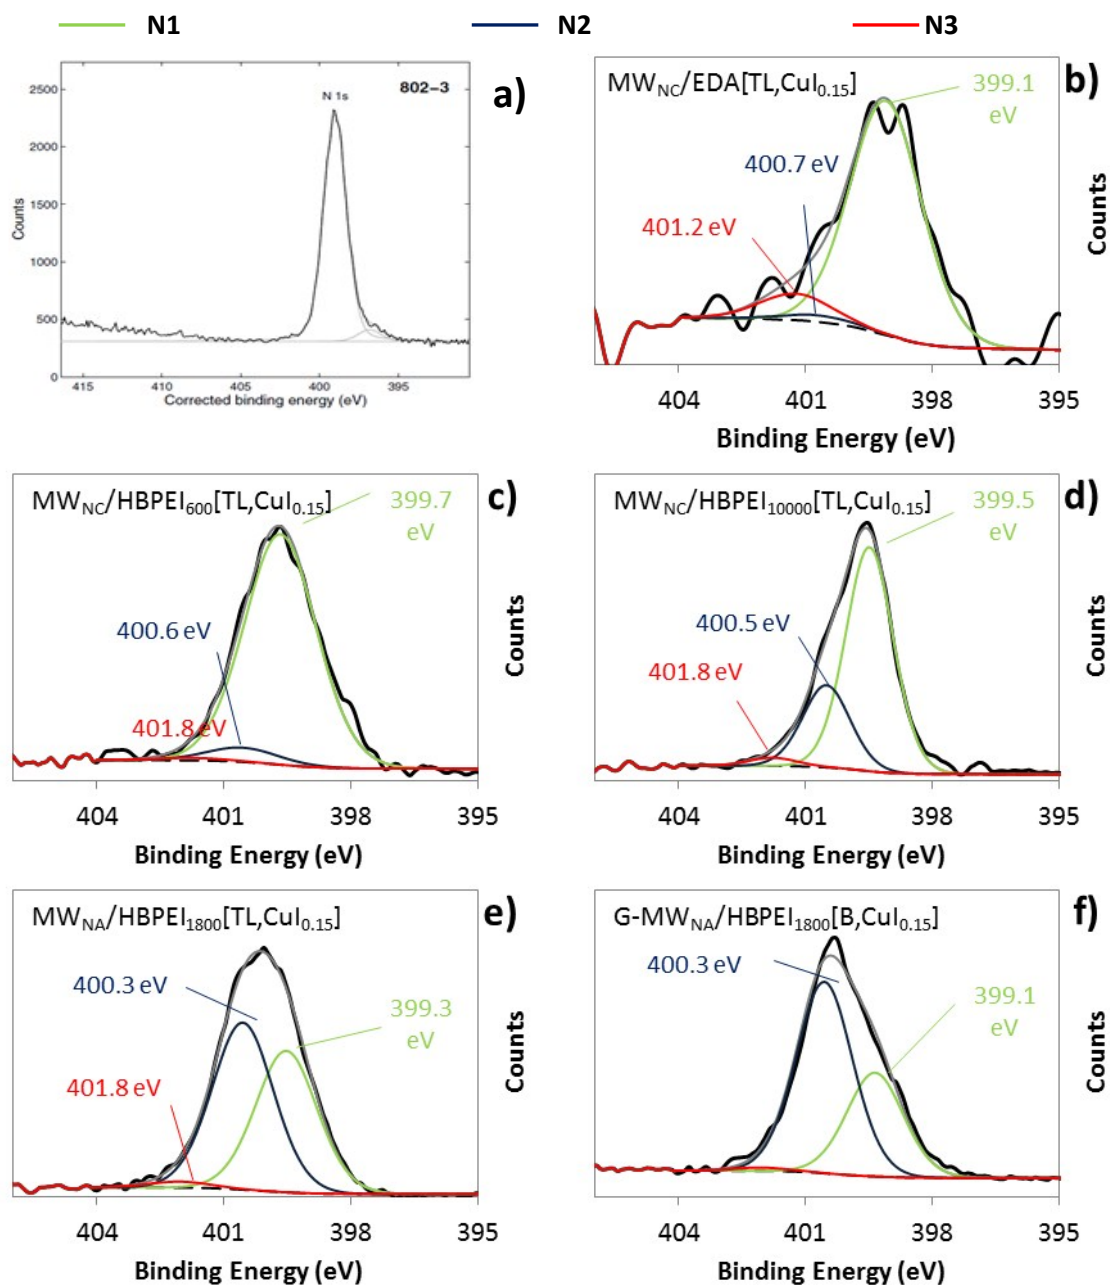

Figure S4. N<sub>1s</sub> XPS high resolution spectra of 'free' HBPEI<sub>1800</sub> and of some selected hybrid materials with different amines or polyamines.

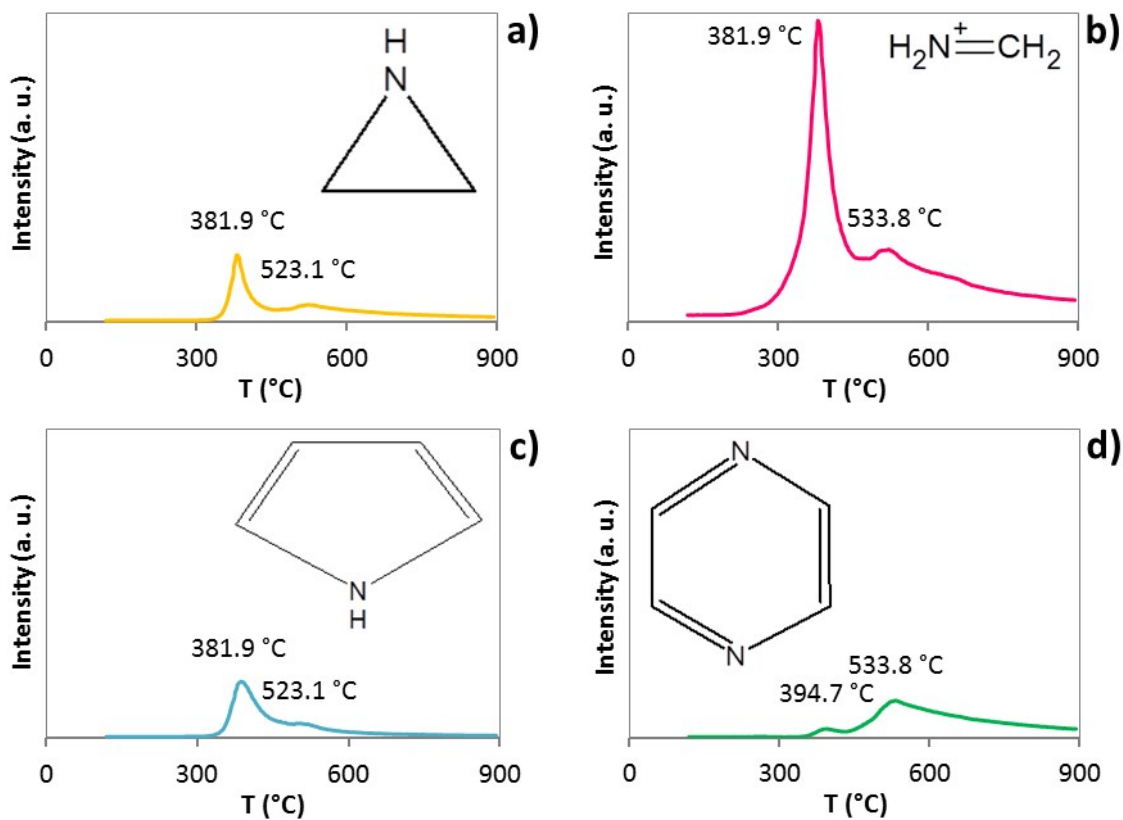

Figure S5. TPD curves of some selected ionic fragments produced by thermal decomposition of the pure HBPEI<sub>1800</sub> with the following mass/charge ( $m/z$ ) ratios: a)  $m/z = 43$ , b)  $m/z = 30$ , c)  $m/z = 67$ , and d)  $m/z = 80$ .

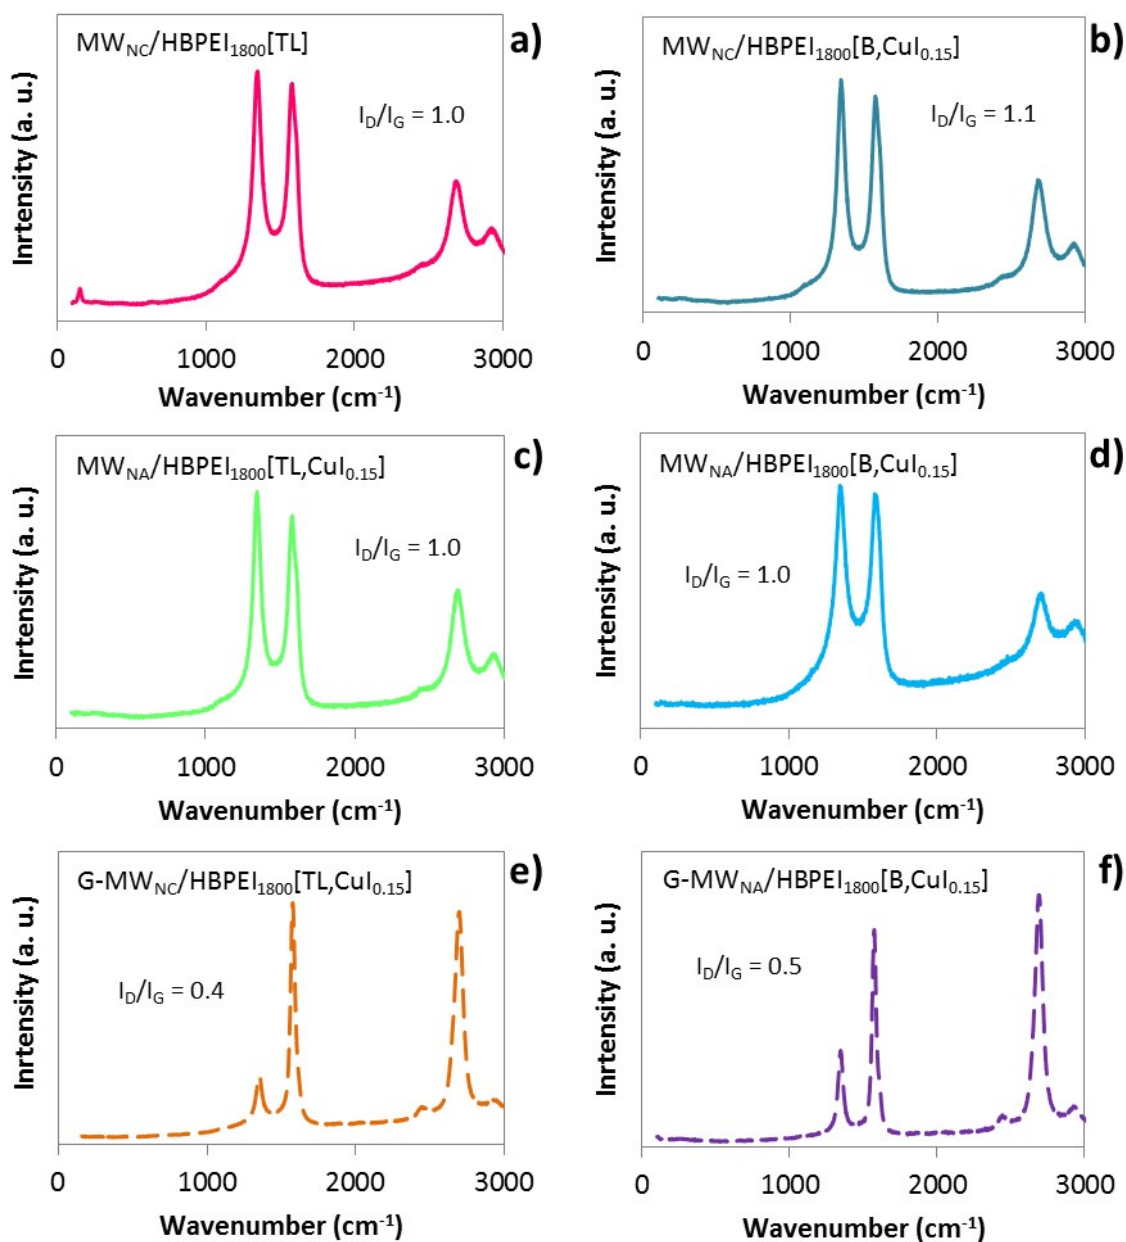

Figure S6. Raman spectra of some selected hybrid materials. Raman spectra of pristine MWCNTs are shown in Figure S1.

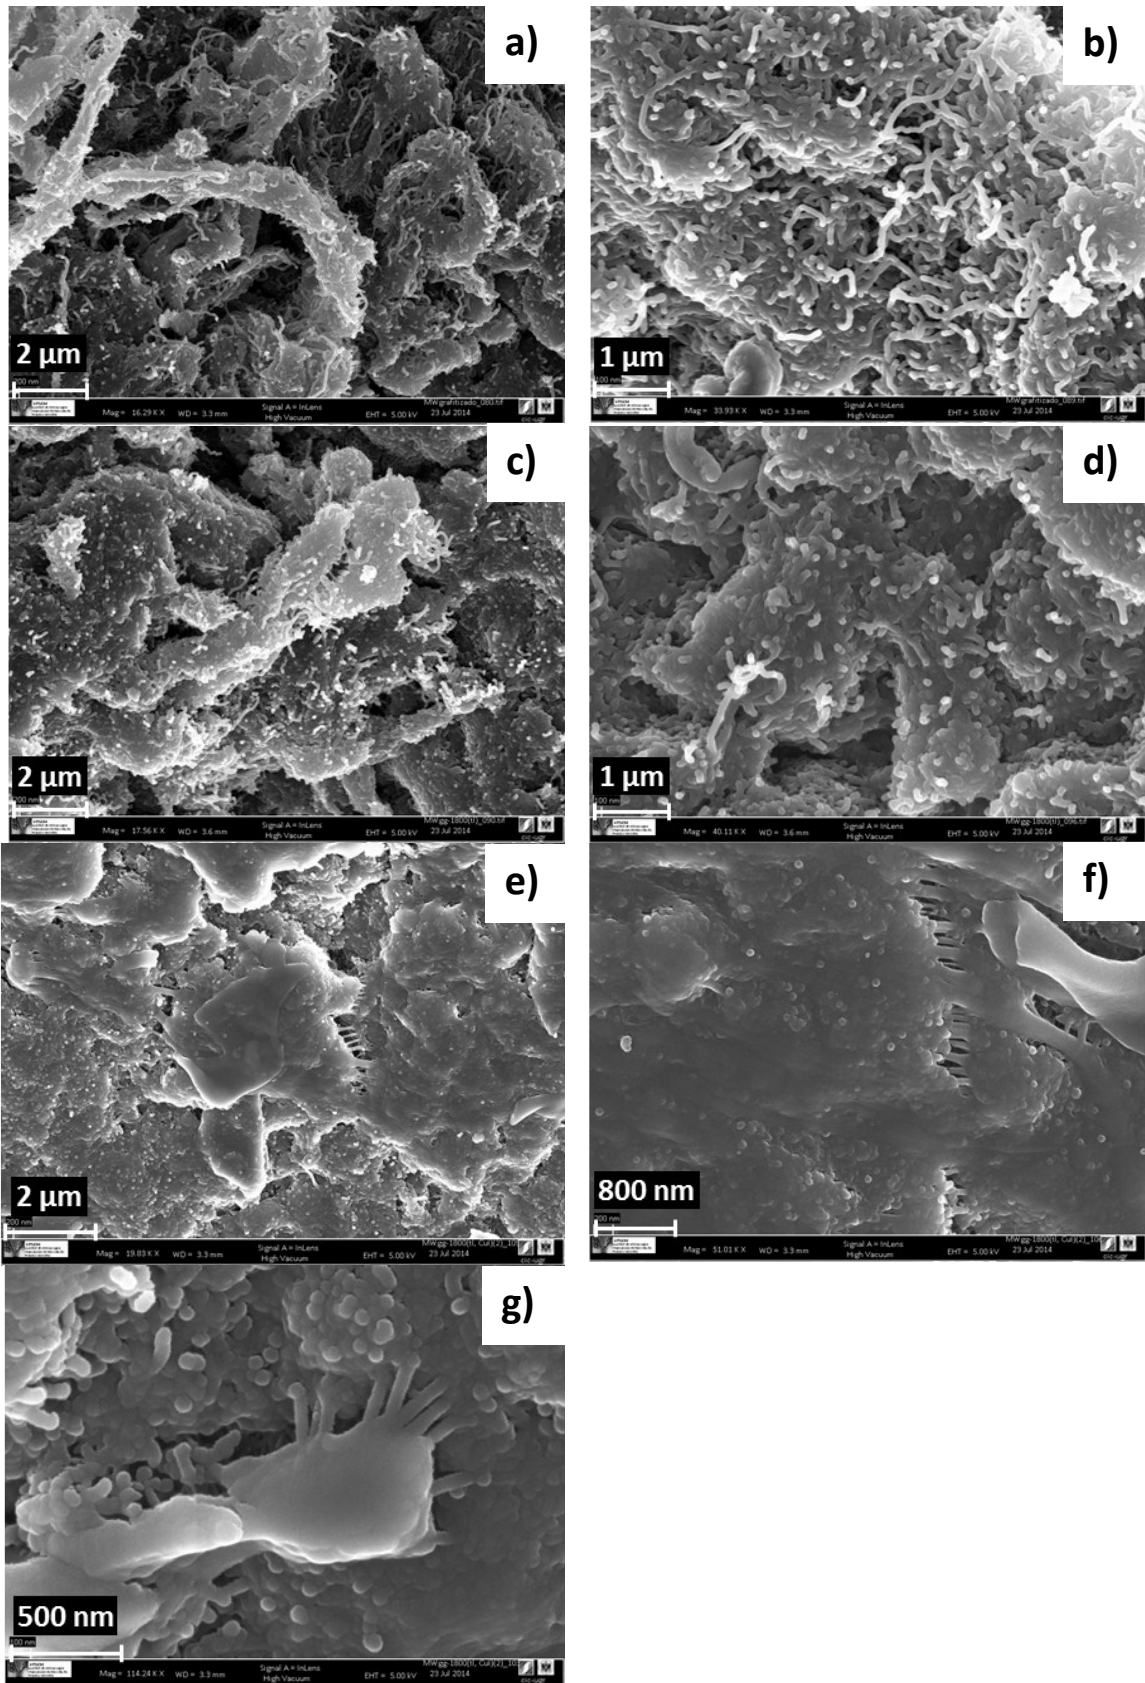

Figure S7. SEM images of a,b) Graphitized Nanocyl MWCNTs (G-MW<sub>NC</sub>), c,d) G-MW<sub>NC</sub>/HBPEI<sub>1800</sub>[TL] hybrid and (e-g) G-MW<sub>NC</sub>/HBPEI<sub>1800</sub>[TL,CuI<sub>0.15</sub>] hybrid.



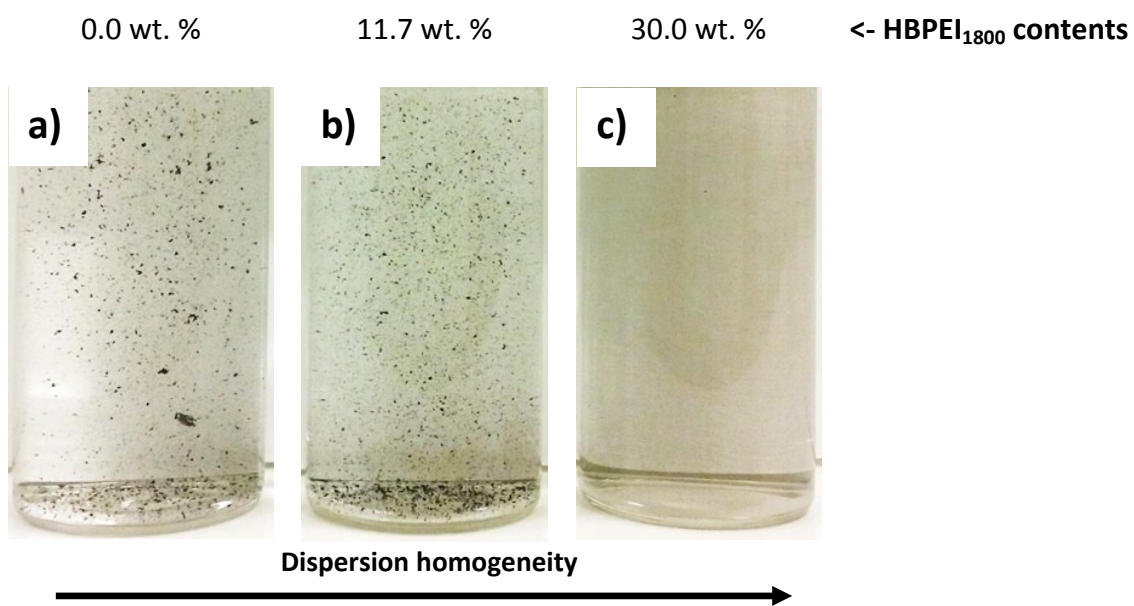

Figure S8. Aspect of aqueous dispersions (after 24 hours of sonication) of a) Nanocyl MWCNTs ( $MW_{NC}$ ) and the hybrids b)  $MW_{NC}/HBPEI_{1800}[TL, CuI_{0.01}]$  and c)  $MW_{NC}/HBPEI_{1800}[TL, CuI_{0.75}]$ . Concentration of the dispersions: 5 mg/L.

Table S1. Surface atomic concentrations obtained from the XPS survey spectra of the pristine MWCNTs and of the hybrid materials.

| Sample                                                                             | C (at. %)*  | O (at. %)* | N (at. %)*  | Cu (at. %)* |
|------------------------------------------------------------------------------------|-------------|------------|-------------|-------------|
| <b>MW<sub>NC</sub></b>                                                             | <b>98.8</b> | <b>1.2</b> | -           | -           |
| MW <sub>NC</sub> /HBPEI <sub>1800</sub> [B]                                        | 94.4        | 2.7        | 2.9         | -           |
| MW <sub>NC</sub> /HBPEI <sub>1800</sub> [B,CuI <sub>0.15</sub> ]                   | 84.7        | 5.1        | 9.6         | 0.2         |
| MW <sub>NC</sub> /HBPEI <sub>1800</sub> [TL]                                       | 91.3        | 2.5        | 6.2         | -           |
| MW <sub>NC</sub> /HBPEI <sub>1800</sub> [TL,CuI <sub>0.01</sub> ]                  | 92.6        | 1.8        | 5.6         | -           |
| MW <sub>NC</sub> /HBPEI <sub>1800</sub> [TL,CuI <sub>0.04</sub> ]                  | 91.3        | 1.0        | 7.7         | -           |
| MW <sub>NC</sub> /HBPEI <sub>1800</sub> [TL,CuI <sub>0.15</sub> ]                  | 85.8        | 3.3        | 10.6        | 0.1         |
| MW <sub>NC</sub> /HBPEI <sub>1800</sub> [TL,CuI <sub>0.35</sub> ]                  | 86.2        | 2.9        | 10.4        | 0.2         |
| MW <sub>NC</sub> /HBPEI <sub>1800</sub> [TL,CuI <sub>0.75</sub> ]                  | 85.6        | 3.4        | 10.2        | 0.2         |
| MW <sub>NC</sub> /HBPEI <sub>1800</sub> [TL,CuI <sub>0.04</sub> ,95°C]             | 96.0        | 0.7        | 3.3         | -           |
| MW <sub>NC</sub> /HBPEI <sub>1800</sub> [TL,CuI <sub>0.04</sub> ,80°C]             | 96.2        | 1.0        | 2.8         | -           |
| MW <sub>NC</sub> /HBPEI <sub>1800</sub> [TL,CuI <sub>0.15</sub> ,1h]               | 96.6        | 1.2        | 2.2         | -           |
| MW <sub>NC</sub> /HBPEI <sub>1800</sub> [TL,CuI <sub>0.15</sub> ,4h]               | 94.4        | 2.1        | 3.4         | -           |
| MW <sub>NC</sub> /HBPEI <sub>1800</sub> [TL,CuI <sub>0.15</sub> ,8h]               | 94.3        | 2.0        | 3.4         | 0.1         |
| MW <sub>NC</sub> /HBPEI <sub>1800</sub> [TL,CuI <sub>0.15</sub> ,16h]              | 87.0        | 3.9        | 8.7         | 0.2         |
| MW <sub>NC</sub> /HBPEI <sub>1800</sub> [TL,CuI <sub>0.15</sub> ,48h]              | 93.7        | 2.7        | 3.5         | 0.1         |
| MW <sub>NC</sub> /HBPEI <sub>600</sub> [TL,CuI <sub>0.15</sub> ]                   | 90.8        | 2.1        | 7.0         | 0.1         |
| MW <sub>NC</sub> /HBPEI <sub>10000</sub> [TL,CuI <sub>0.15</sub> ]                 | 87.1        | 2.2        | 10.4        | 0.1         |
| <b>MW<sub>NA</sub></b>                                                             | <b>98.2</b> | <b>1.8</b> | -           | -           |
| MW <sub>NA</sub> /HBPEI <sub>1800</sub> [TL]                                       | 81.4        | 5.4        | 13.2        | -           |
| MW <sub>NA</sub> /HBPEI <sub>1800</sub> [TL,CuI <sub>0.15</sub> ]                  | 81.6        | 5.3        | 13.1        | 0.1         |
| MW <sub>NA</sub> /HBPEI <sub>1800</sub> [B]                                        | 94.1        | 2.2        | 3.7         | -           |
| MW <sub>NA</sub> /HBPEI <sub>1800</sub> [B,CuI <sub>0.03</sub> ]                   | 90.7        | 3.8        | 5.5         | -           |
| MW <sub>NA</sub> /HBPEI <sub>1800</sub> [B,CuI <sub>0.05</sub> ]                   | 84.8        | 6.1        | 8.9         | 0.2         |
| MW <sub>NA</sub> /HBPEI <sub>1800</sub> [B,CuI <sub>0.10</sub> ]                   | 82.8        | 5.9        | 10.9        | 0.1         |
| MW <sub>NA</sub> /HBPEI <sub>1800</sub> [B,CuI <sub>0.15</sub> ]                   | 77.1        | 7.0        | 14.8        | 0.3         |
| MW <sub>NA</sub> /HBPEI <sub>1800</sub> [B,CuI <sub>0.25</sub> ]                   | 76.9        | 7.1        | 14.5        | 0.4         |
| MW <sub>NA</sub> /HBPEI <sub>1800</sub> [B,Bu <sub>4</sub> NI]                     | 93.9        | 3.1        | 2.9         | -           |
| MW <sub>NA</sub> /HBPEI <sub>1800</sub> [B,CuCl <sub>2</sub> + Bu <sub>4</sub> NI] | 86.2        | 5.7        | 7.8         | 0.2         |
| MW <sub>NA</sub> /HBPEI <sub>1800</sub> [B,Cu(o)]                                  | 88.6        | 4.4        | 6.9         | 0.1         |
| MW <sub>NA</sub> /HBPEI <sub>1800</sub> [B,NiCl <sub>2</sub> ]                     | 89.7        | 3.7        | 6.4         | -           |
| MW <sub>NA</sub> /HBPEI <sub>1800</sub> [B,CuOAc]                                  | 81.6        | 7.1        | 10.9        | 0.4         |
| MW <sub>NA</sub> /HBPEI <sub>1800</sub> [B,CuOAc + Bu <sub>4</sub> NI]             | 77.7        | 8.3        | 13.3        | 0.4         |
| <b>G-MW<sub>NC</sub></b>                                                           | <b>99.8</b> | <b>0.2</b> | -           | -           |
| G-MW <sub>NC</sub> /HBPEI <sub>1800</sub> [TL]                                     | 98.8        | 0.4        | 0.8         | -           |
| G-MW <sub>NC</sub> /HBPEI <sub>1800</sub> [TL,CuI <sub>0.15</sub> ]                | 83.4        | 5.4        | 11.0        | 0.1         |
| <b>G-MW<sub>NA</sub></b>                                                           | <b>99.9</b> | <b>0.1</b> | -           | -           |
| G-MW <sub>NA</sub> /HBPEI <sub>1800</sub> [B]                                      | 96.7        | 1.4        | 1.9         | -           |
| G-MW <sub>NA</sub> /HBPEI <sub>1800</sub> [B,CuI <sub>0.15</sub> ]                 | <b>78.2</b> | <b>7.8</b> | <b>13.2</b> | <b>0.3</b>  |

\* Calculated from C1s, O1s, N1s and Cu2p peaks, respectively, in XPS survey spectra by using CASAXPS software.

Table S2. From left to right columns (starting in the second): amounts of catalyst, polyamine, adsorbed CO<sub>2</sub>, nitrogen and adsorbed CO<sub>2</sub> per nitrogen (efficiency of the adsorption) of some selected hybrids.

| Sample                                                            | Ratio<br>CuI:MWCNT<br>(wt./wt.) | HBPEI<br>in hybrid<br>(wt.-%) | n <sub>ads</sub> <sup>0.03</sup><br>(mmol g <sup>-1</sup> ) | mmol N per<br>g hybrid | mmol CO <sub>2</sub><br>per<br>mmol N |
|-------------------------------------------------------------------|---------------------------------|-------------------------------|-------------------------------------------------------------|------------------------|---------------------------------------|
| MW <sub>NC</sub> /HBPEI <sub>1800</sub> [TL]                      | 0.00                            | 19.04                         | 0.77                                                        | 4.42                   | 0.17                                  |
| MW <sub>NC</sub> /HBPEI <sub>1800</sub> [TL,CuI <sub>0.01</sub> ] | 0.01                            | 17.32                         | 1.36                                                        | 4.02                   | 0.34                                  |
| MW <sub>NC</sub> /HBPEI <sub>1800</sub> [TL,CuI <sub>0.04</sub> ] | 0.04                            | 23.57                         | 2.21                                                        | 5.47                   | 0.40                                  |
| MW <sub>NC</sub> /HBPEI <sub>1800</sub> [TL,CuI <sub>0.15</sub> ] | 0.15                            | 32.76                         | 1.56                                                        | 7.61                   | 0.21                                  |
| MW <sub>NC</sub> /HBPEI <sub>1800</sub> [TL,CuI <sub>0.35</sub> ] | 0.35                            | 31.87                         | 0.62                                                        | 7.40                   | 0.08                                  |
| MW <sub>NC</sub> /HBPEI <sub>1800</sub> [TL,CuI <sub>0.75</sub> ] | 0.75                            | 31.32                         | 0.56                                                        | 7.27                   | 0.08                                  |

## REFERENCES

1. P. Louette, F. Bodino and J.-J. Pireaux, *Surface Science Spectra*, 2005, **12**, 4.
